# Supplementary material for: Synthesis of New Polyheterocyclic Pyrrolo[3,4-b]pyridin-5-ones via an Ugi-Zhu/Cascade/Click Strategy
Source: MDPI journal article supplement (doi:10.3390/molecules28104087), 2023-05-14
Supplement: s1 [file s1]

# SUPPLEMENTARY MATERIALS

## Synthesis of new polyheterocyclic pyrrolo[3,4-*b*]pyridin-5-ones via an Ugi-Zhu / cascade / click strategy

Roberto E. Blanco-Carapia <sup>1</sup>, Enrique A. Aguilar-Rangel <sup>1</sup>, Mónica A. Rincón-Guevara <sup>2</sup>, Alejandro Islas-Jácome <sup>1,\*</sup>, and Eduardo González-Zamora <sup>1,\*</sup>

\* Correspondence: [aij@xanum.uam.mx](mailto:aij@xanum.uam.mx) (A.I.-J); [egz@xanum.uam.mx](mailto:egz@xanum.uam.mx) (E.G.-Z.)

### TABLE OF CONTENTS

| Spectra of the compounds                                                                                          | Page |
|-------------------------------------------------------------------------------------------------------------------|------|
| Synthesis of the imine <b>12</b> .....                                                                            | S2   |
| <sup>1</sup> H-NMR and <sup>13</sup> C-NMR of the imine <b>12</b> .....                                           | S3   |
| HRMS and FT-IR of the imine <b>12</b> .....                                                                       | S4   |
| Synthesis of the 5-aminooxazole <b>14</b> .....                                                                   | S5   |
| <sup>1</sup> H-NMR and <sup>13</sup> C-NMR of the 5-aminooxazole <b>14</b> .....                                  | S6   |
| HRMS and FT-IR of the 5-aminooxazole <b>14</b> .....                                                              | S7   |
| Synthesis of the cyano-pyrrolo[3,4- <i>b</i> ]pyridin-5-one <b>17</b> .....                                       | S8   |
| <sup>1</sup> H-NMR and <sup>13</sup> C-NMR of the cyano-pyrrolo[3,4- <i>b</i> ]pyridin-5-one <b>17</b> .....      | S9   |
| HRMS and FT-IR of the cyano-pyrrolo[3,4- <i>b</i> ]pyridin-5-one <b>17</b> .....                                  | S10  |
| Synthesis of the tetrazolyl-pyrrolo[3,4- <i>b</i> ]pyridin-5-one <b>19</b> .....                                  | S11  |
| <sup>1</sup> H-NMR and <sup>13</sup> C-NMR of the tetrazolyl-pyrrolo[3,4- <i>b</i> ]pyridin-5-one <b>19</b> ..... | S12  |
| 2D-NMR (COSY and HSQC-part I) of the tetrazolyl-pyrrolo[3,4- <i>b</i> ]pyridin-5-one <b>19</b> .....              | S13  |
| 2D-NMR (HSQC-part II and HMBC-part I) of the tetrazolyl-pyrrolo[3,4- <i>b</i> ]pyridin-5-one <b>19</b> ....       | S14  |
| 2D-NMR (HMBC-part II and HMBC-part III) of the tetrazolyl-pyrrolo[3,4- <i>b</i> ]pyridin-5-one <b>19</b> ..       | S15  |
| HRMS and FT-IR of the tetrazolyl-pyrrolo[3,4- <i>b</i> ]pyridin-5-one <b>19</b> .....                             | S16  |
| Synthesis of the triazine-pyrrolo[3,4- <i>b</i> ]pyridin-5-one <b>21</b> .....                                    | S17  |
| <sup>1</sup> H-NMR and <sup>13</sup> C-NMR of the triazine-pyrrolo[3,4- <i>b</i> ]pyridin-5-one <b>21</b> .....   | S18  |
| 2D-NMR (COSY and HSQC-part I) of the triazine-pyrrolo[3,4- <i>b</i> ]pyridin-5-one <b>21</b> .....                | S19  |
| 2D-NMR (HSQC-part II and HMBC-part I) of the triazine-pyrrolo[3,4- <i>b</i> ]pyridin-5-one <b>21</b> .....        | S20  |
| 2D-NMR (HMBC-part II and HMBC-part III) of the triazine-pyrrolo[3,4- <i>b</i> ]pyridin-5-one <b>21</b> ....       | S21  |
| HRMS and FT-IR of the triazine-pyrrolo[3,4- <i>b</i> ]pyridin-5-one <b>21</b> .....                               | S22  |

**Table S1.** Synthesis of the Schiff base **12**.

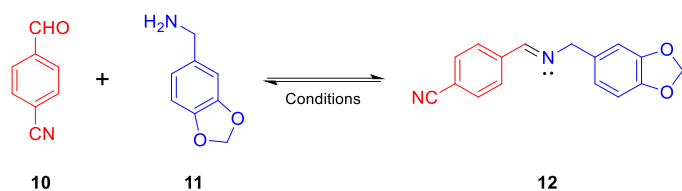

| Entry <sup>a</sup> | Solvent | Additive                        | Temperature <sup>b</sup> (°C) | Time (h) | Yield <sup>c</sup> (%) |
|--------------------|---------|---------------------------------|-------------------------------|----------|------------------------|
| 1                  | MeOH    | --                              | rt                            | 24       | --                     |
| 2                  | MeOH    | --                              | 50                            | 1        | --                     |
| 3                  | PhMe    | --                              | 70                            | 1        | traces                 |
| 4                  | PhMe    | --                              | 80                            | 1        | 35                     |
| 5                  | PhMe    | --                              | 90                            | 0.5      | 69                     |
| 6                  | PhMe    | molecular sieves                | 90                            | 0.5      | 73                     |
| 7 <sup>d</sup>     | PhMe    | Na <sub>2</sub> SO <sub>4</sub> | 90                            | 0.5      | 90                     |

<sup>a</sup> Concentration in all inputs was [2 M]. <sup>b</sup> MW were the heating source (except for entry 1).

<sup>c</sup> Calculated after purification by precipitation–filtration. <sup>d</sup> Optimal reaction conditions.

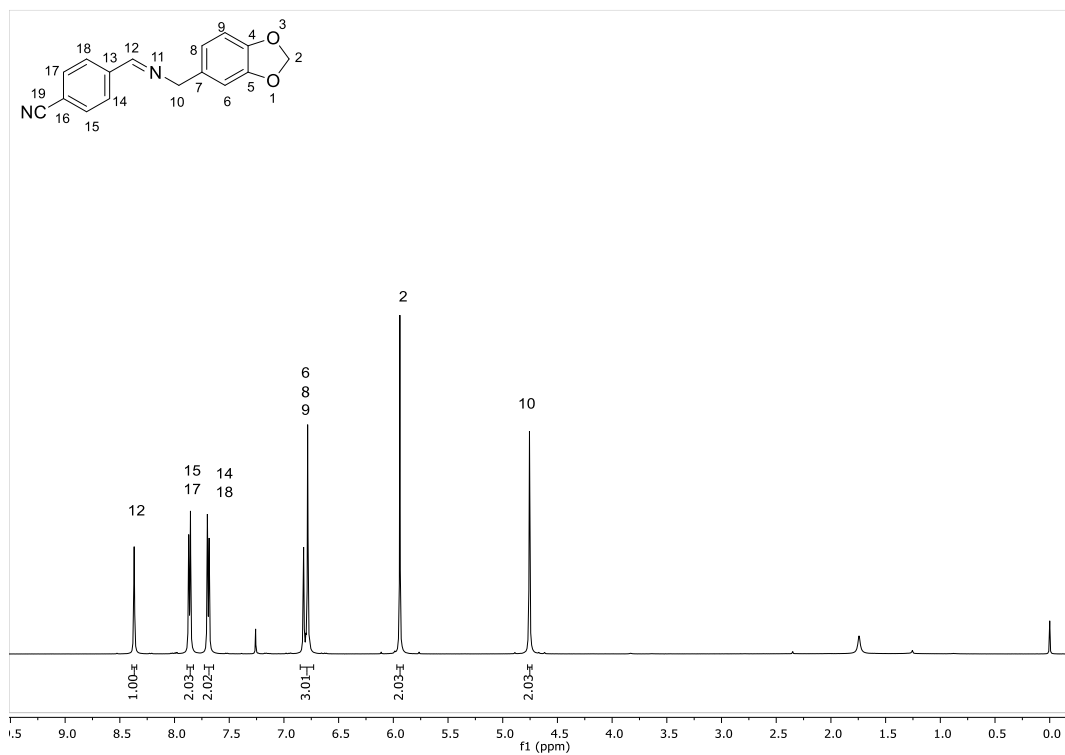

**Figure S1.**  $^1\text{H}$ -NMR (500 MHz,  $\text{CDCl}_3$ ) spectrum of the imine **12**

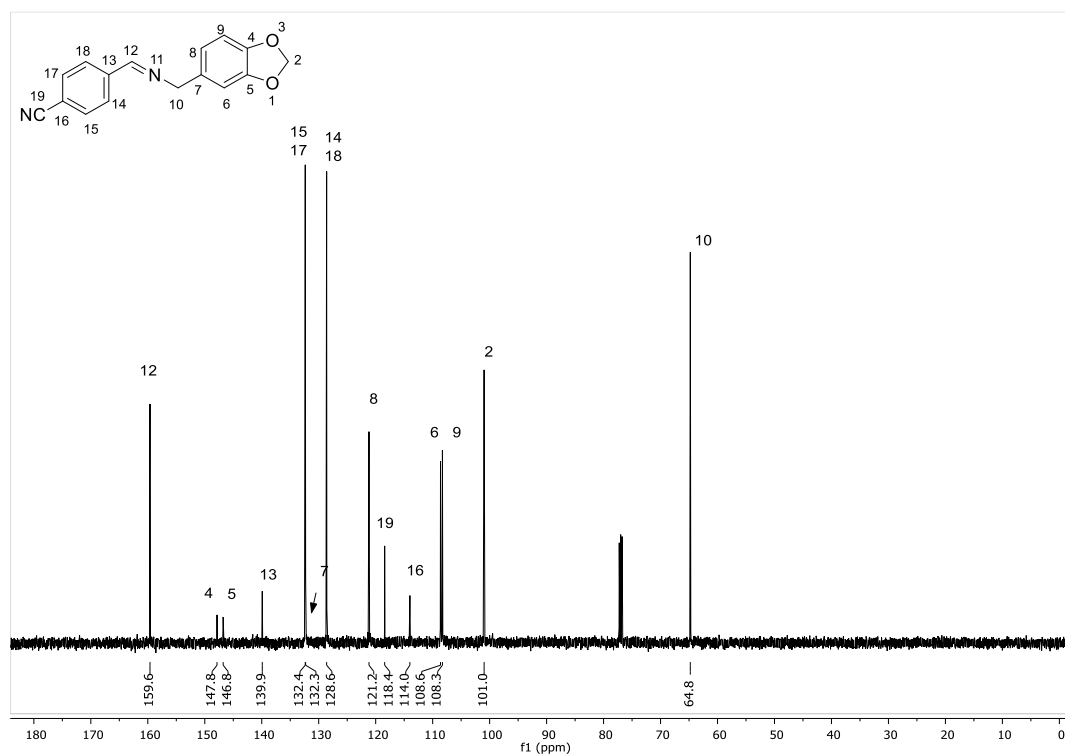

**Figure S2.**  $^{13}\text{C}$ -NMR (125 MHz,  $\text{CDCl}_3$ ) spectrum of the imine **12**

## Mass Spectrum SmartFormula Report

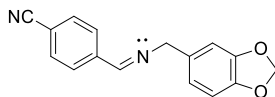

Chemical Formula: C<sub>16</sub>H<sub>12</sub>N<sub>2</sub>O<sub>2</sub>  
Exact Mass: 264.09

### Acquisition Parameter

|             |          |                      |          |                  |           |
|-------------|----------|----------------------|----------|------------------|-----------|
| Source Type | ESI      | Ion Polarity         | Positive | Set Nebulizer    | 0.3 Bar   |
| Focus       | Active   |                      |          | Set Dry Heater   | 180 °C    |
| Scan Begin  | 50 m/z   | Set Capillary        | 4500 V   | Set Dry Gas      | 4.0 l/min |
| Scan End    | 3000 m/z | Set End Plate Offset | -500 V   | Set Divert Valve | Waste     |

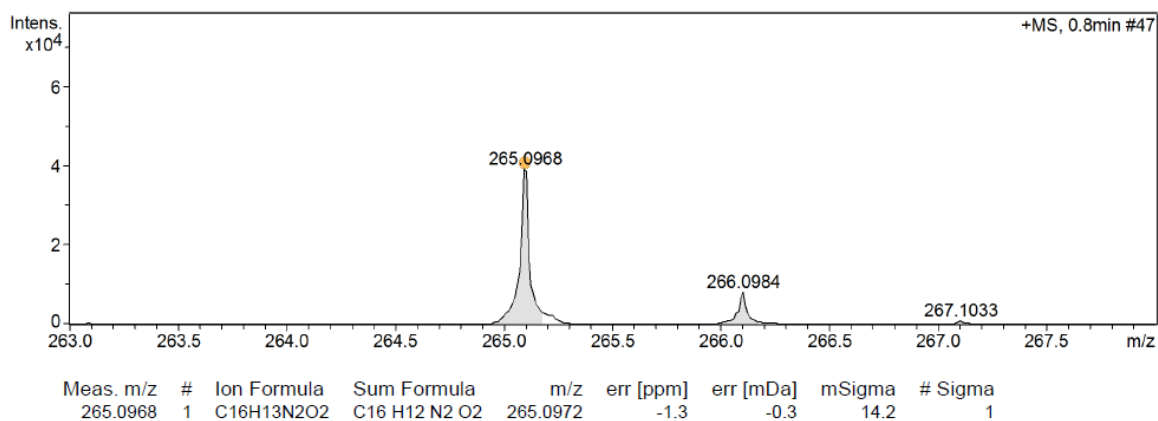

Figure S3. HRMS (ESI<sup>+</sup>-TOF) spectrum of the imine 12

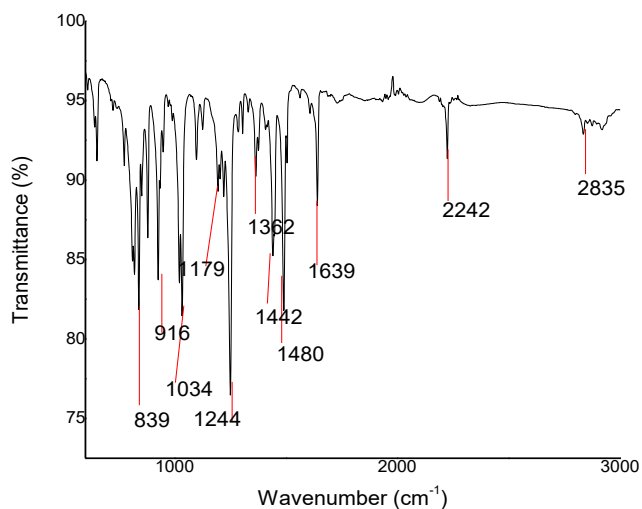

Figure S4. FT-IR (ATR) spectrum of the imine 12

Chemical reaction scheme showing the synthesis of compound **14** from compound **12** and reagent **13** under conditions.

Compound **12** (a 4-cyanobenzaldehyde derivative) reacts with reagent **13** (a 2-cyano-N-(2-morpholinoethyl)benzamide derivative) under conditions to yield compound **14** (a 4-cyanobenzaldehyde derivative).

<sup>a</sup> PhMe was the solvent, and concentration in all inputs was [1.5 M]. <sup>b</sup> MW were the heating source (except for entry 1). <sup>c</sup> Calculated after purification by preparative TLC. <sup>d</sup> Optimal reaction conditions.

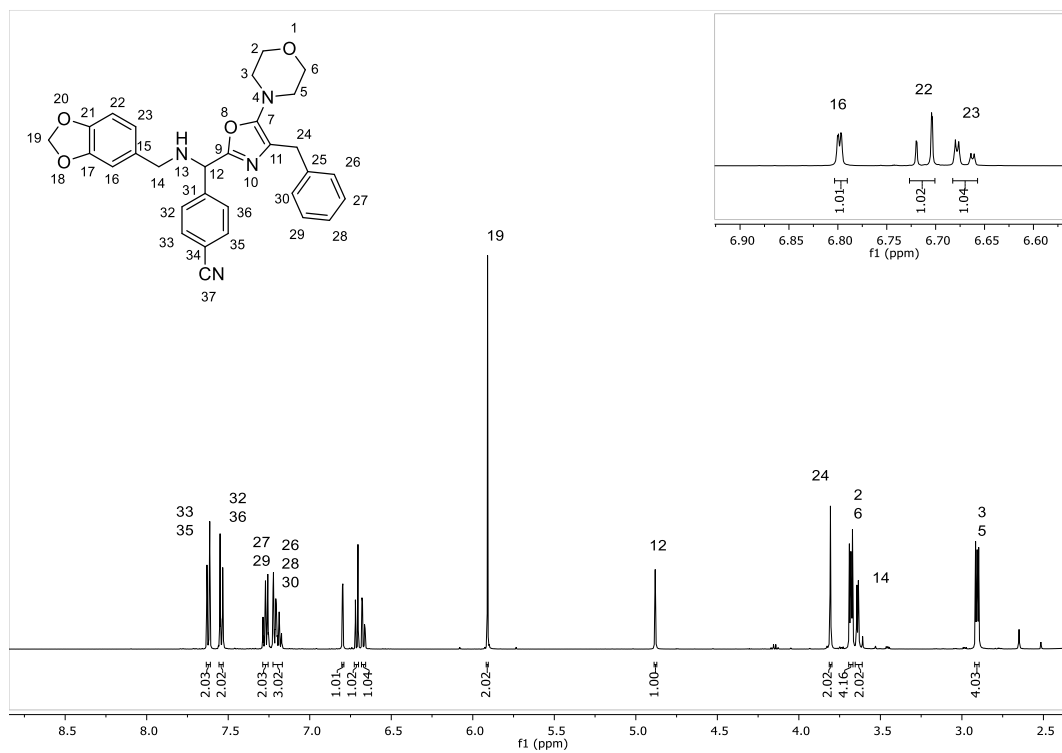

**Figure S5.** <sup>1</sup>H-NMR (500 MHz, CDCl<sub>3</sub>) spectrum of the 5-aminoxazole **14**

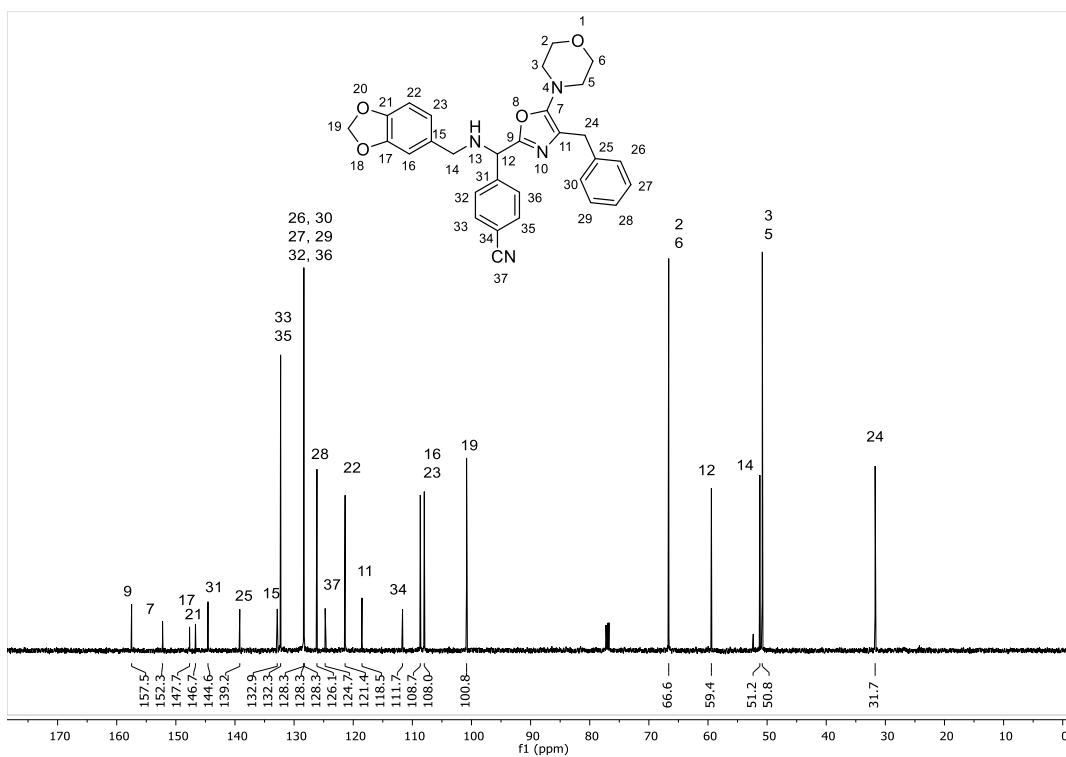

**Figure S6.** <sup>13</sup>C-NMR (125 MHz, CDCl<sub>3</sub>) spectrum of the 5-aminoxazole **14**

# Mass Spectrum SmartFormula Report

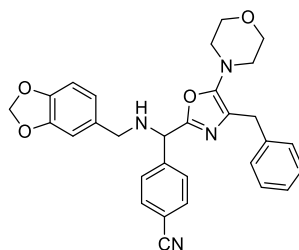

Chemical Formula:  $C_{30}H_{28}N_4O_4$   
Exact Mass: 508.21

## Acquisition Parameter

|             |          |                      |          |                  |           |
|-------------|----------|----------------------|----------|------------------|-----------|
| Source Type | ESI      | Ion Polarity         | Positive | Set Nebulizer    | 0.3 Bar   |
| Focus       | Active   |                      |          | Set Dry Heater   | 180 °C    |
| Scan Begin  | 50 m/z   | Set Capillary        | 4500 V   | Set Dry Gas      | 4.0 l/min |
| Scan End    | 3000 m/z | Set End Plate Offset | -500 V   | Set Divert Valve | Waste     |

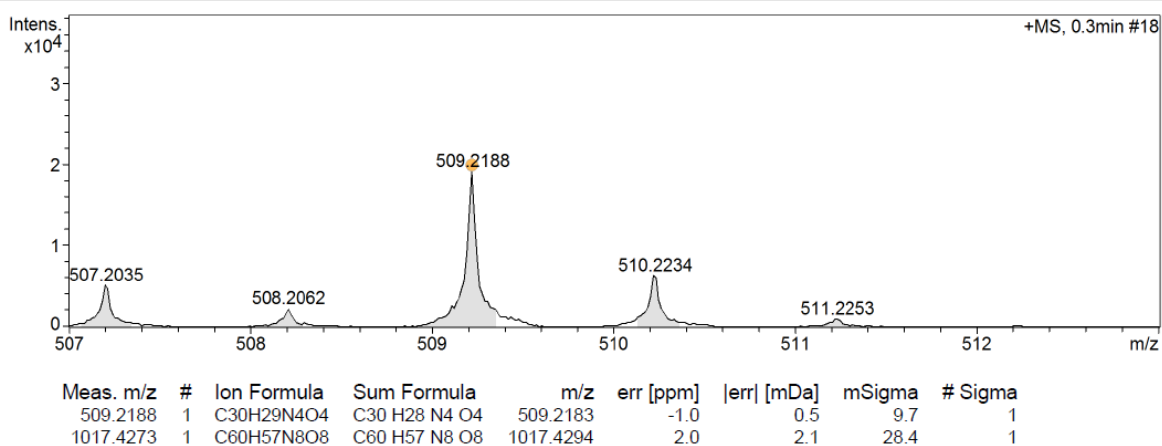

Figure S7. HRMS (ESI<sup>+</sup>-TOF) spectrum of the 5-aminooxazole 14

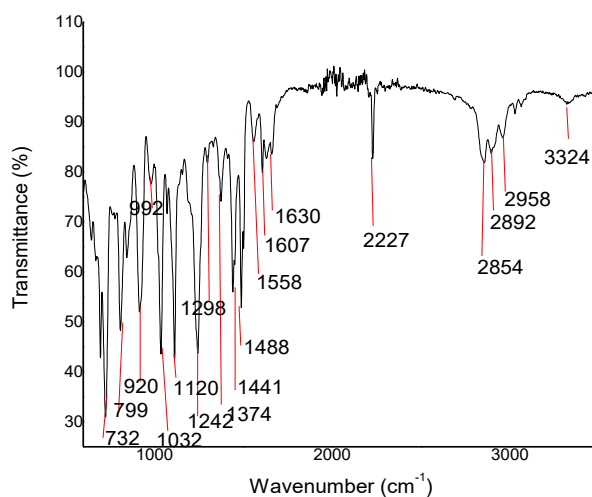

Figure S8. FT-IR (ATR) spectrum of the 5-aminooxazole 14

**Table S3.** Synthesis of the cyano-pyrrolo[3,4-*b*]pyridin-5-one **17**.

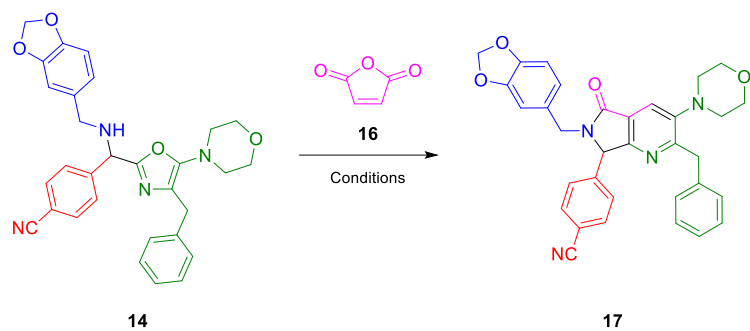

| Entry <sup>a</sup> | Temperature <sup>b</sup> (°C) | Time (h) | Yield <sup>c</sup> (%) |
|--------------------|-------------------------------|----------|------------------------|
| 1                  | 25                            | 1        | --                     |
| 2                  | 50                            | 1        | --                     |
| 3                  | 60                            | 1/3      | 31                     |
| 4                  | 70                            | 1/3      | 66                     |
| 5 <sup>d</sup>     | 80                            | 1/3      | 96                     |

<sup>a</sup> PhMe was the solvent, and concentration in all inputs was [1.5 M]. <sup>b</sup> MW were the heating source.

<sup>c</sup> Calculated after purification by preparative TLC. <sup>d</sup> Optimal reaction conditions.



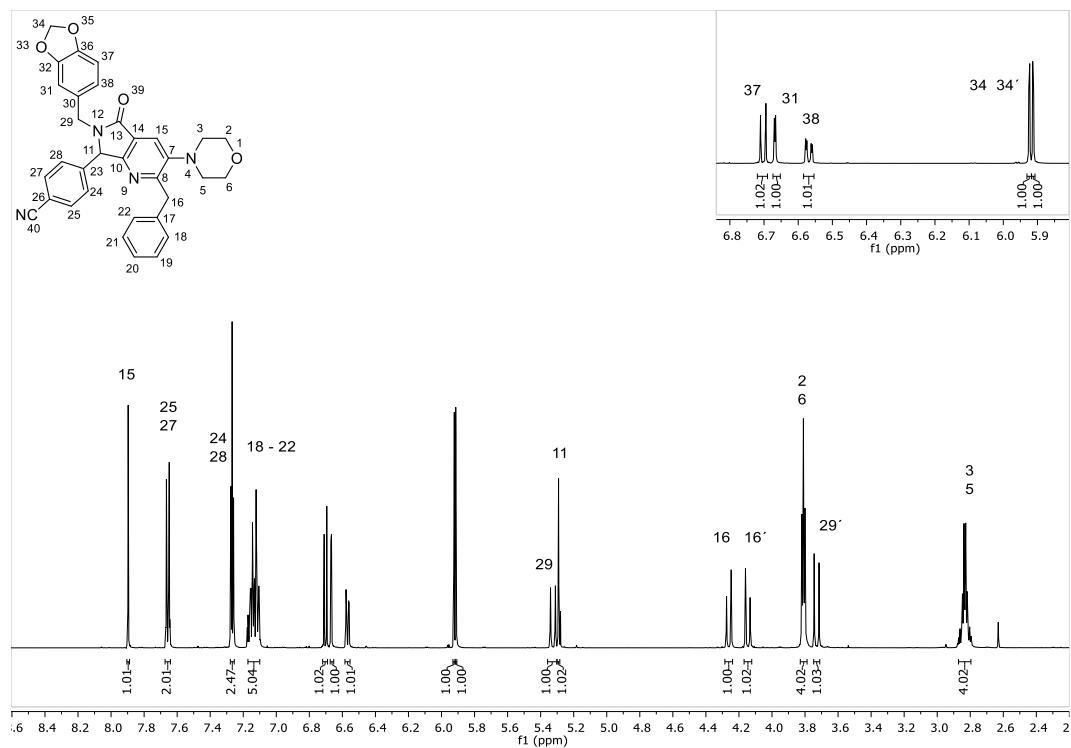

**Figure S9.**  $^1\text{H-NMR}$  (500 MHz,  $\text{CDCl}_3$ ) spectrum of cyano-pyrrolo[3,4-*b*]pyridin-5-one **17**

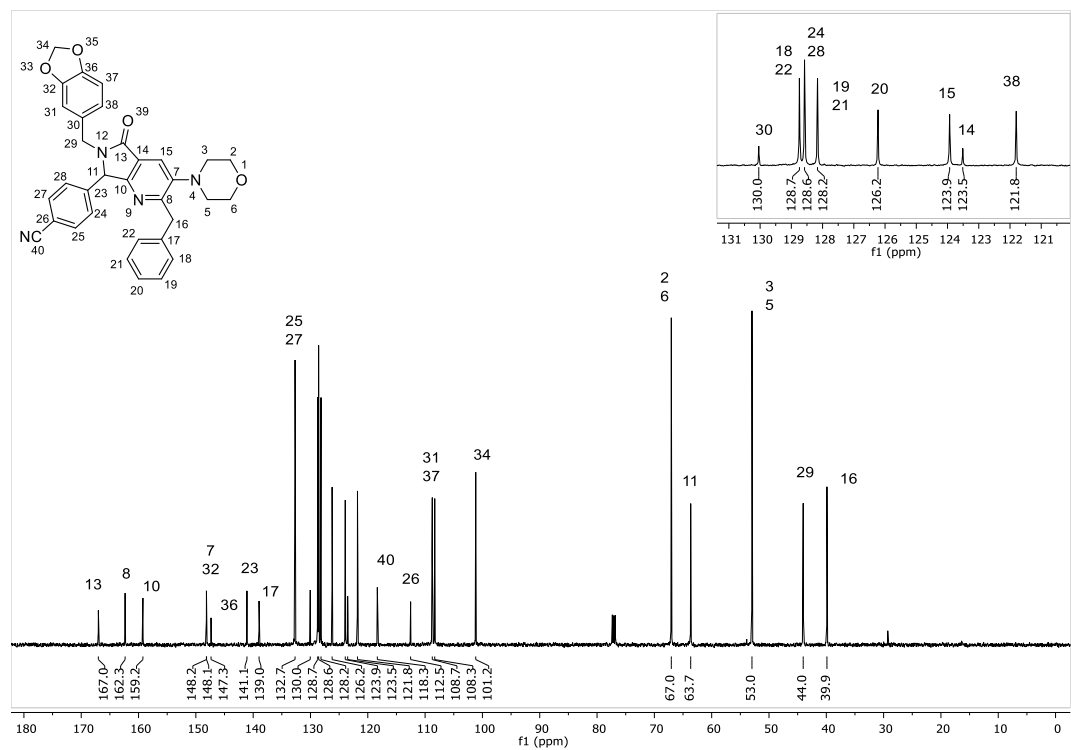

**Figure S10.**  $^{13}\text{C-NMR}$  (125 MHz,  $\text{CDCl}_3$ ) spectrum of the cyano-pyrrolo[3,4-*b*]pyridin-5-one **17**

## Mass Spectrum SmartFormula Report

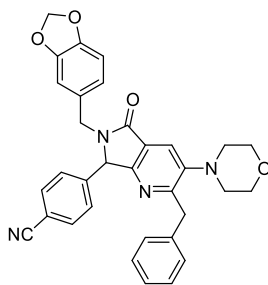

Chemical Formula:  $C_{33}H_{28}N_4O_4$   
Exact Mass: 544.21

### Acquisition Parameter

|             |          |                      |          |                  |           |
|-------------|----------|----------------------|----------|------------------|-----------|
| Source Type | ESI      | Ion Polarity         | Positive | Set Nebulizer    | 0.3 Bar   |
| Focus       | Active   |                      |          | Set Dry Heater   | 180 °C    |
| Scan Begin  | 50 m/z   | Set Capillary        | 4500 V   | Set Dry Gas      | 4.0 l/min |
| Scan End    | 3000 m/z | Set End Plate Offset | -500 V   | Set Divert Valve | Waste     |

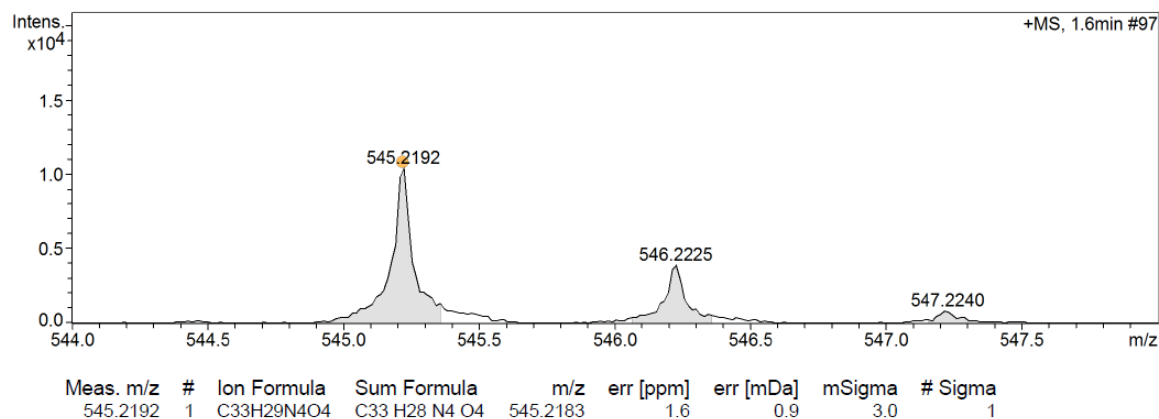

Figure S11. HRMS (ESI+-TOF) spectrum of the cyano-pyrrolo[3,4-*b*]pyridin-5-one 17

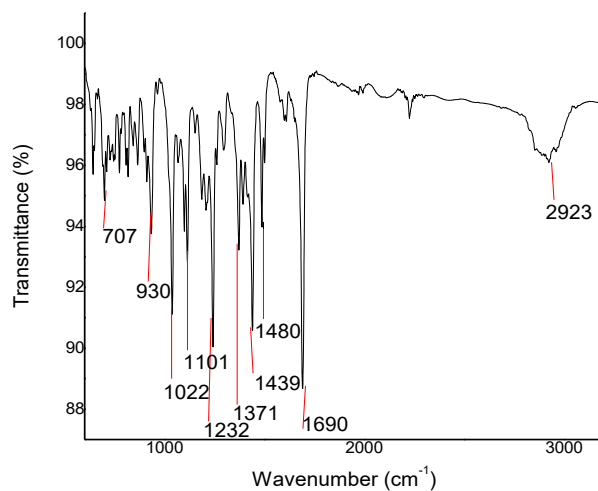

Figure S12. FT-IR (ATR) spectrum of the cyano-pyrrolo[3,4-*b*]pyridin-5-one 17

**Table S4.** Synthesis of the 5-substituted-1*H*-tetrazolyl-pyrrolo[3,4-*b*]pyridin-5-one **19** via a [3+2] cycloaddition with the participation of azide anion as linear 4π-component.

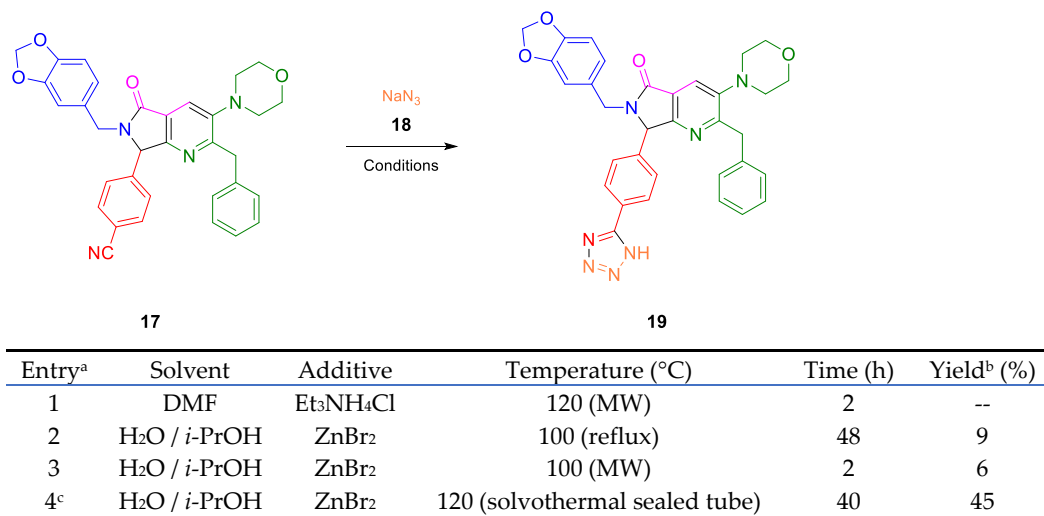

<sup>a</sup> Concentration in all inputs was [2.25 M]. <sup>b</sup> Calculated after purification by precipitation–filtration.

<sup>c</sup> Optimal reaction conditions.

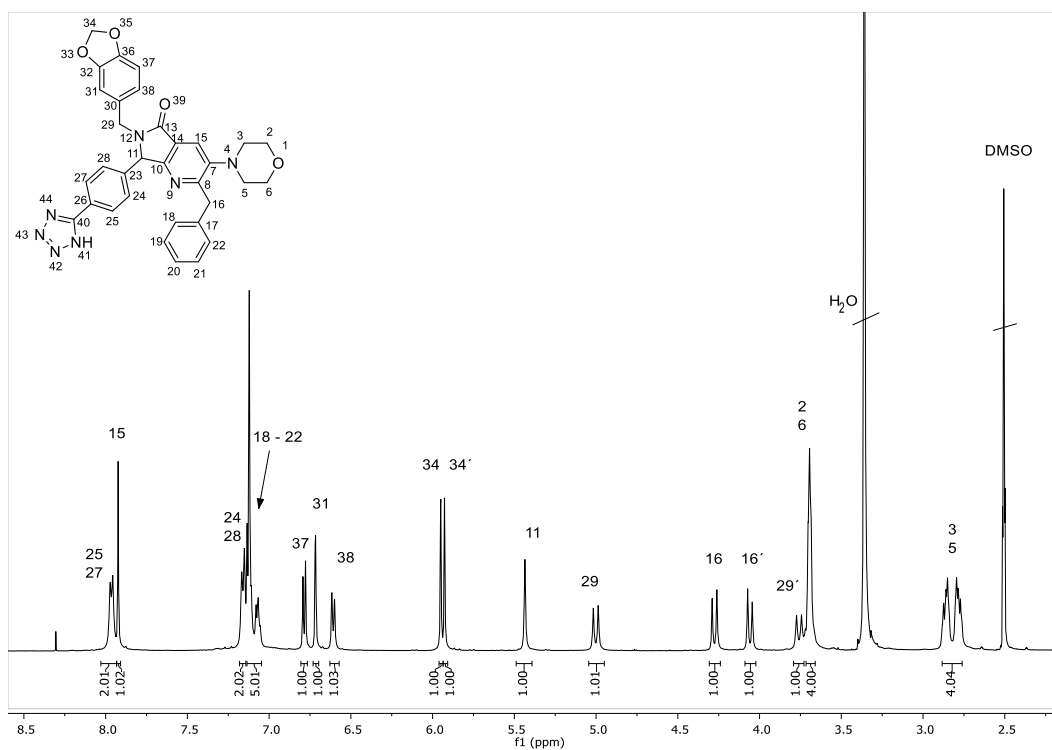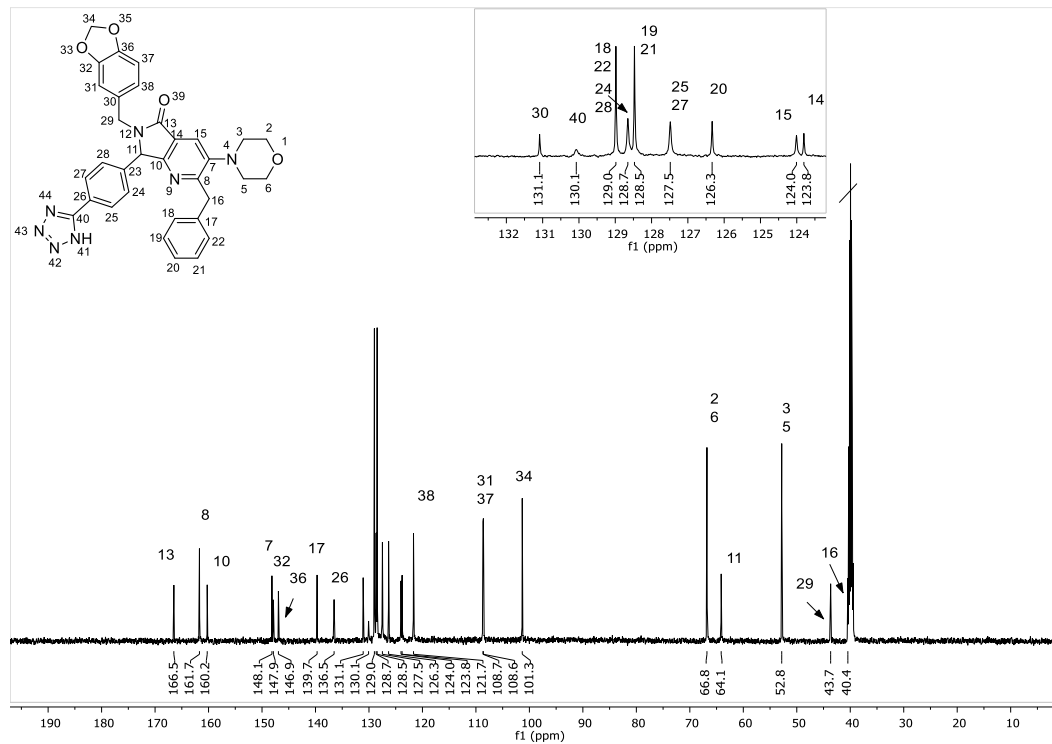

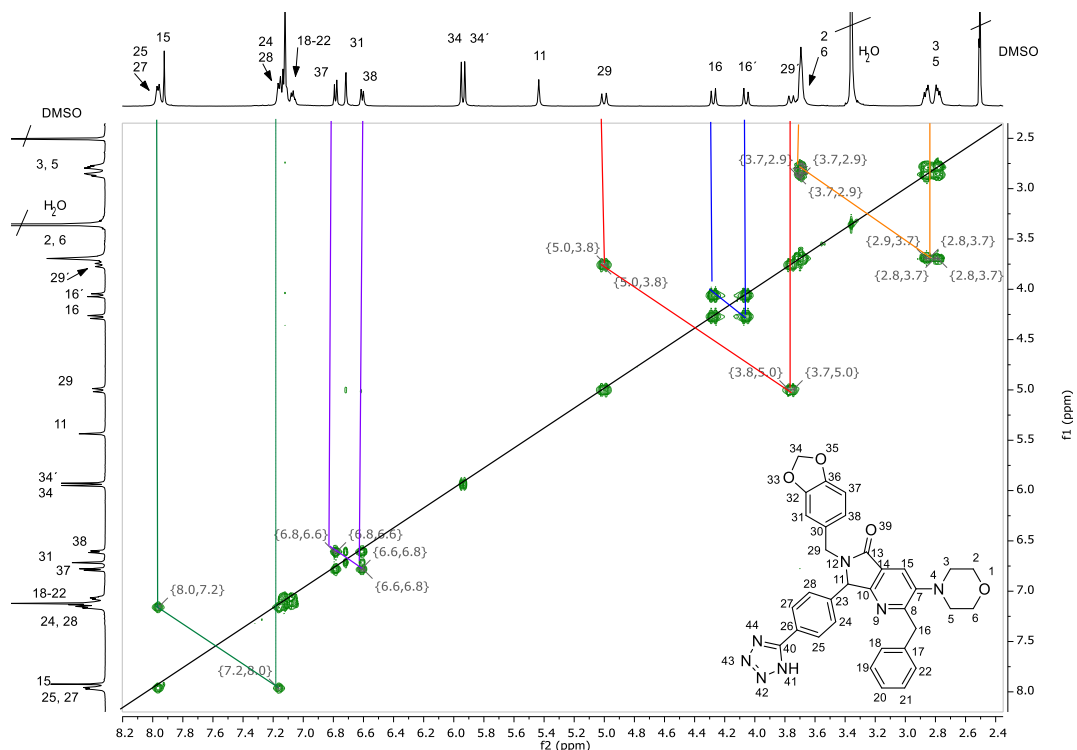

Figure S15. 2D-NMR (COSY) spectrum of the tetrazolyl-pyrrolo[3,4-*b*]pyridin-5-one **19**

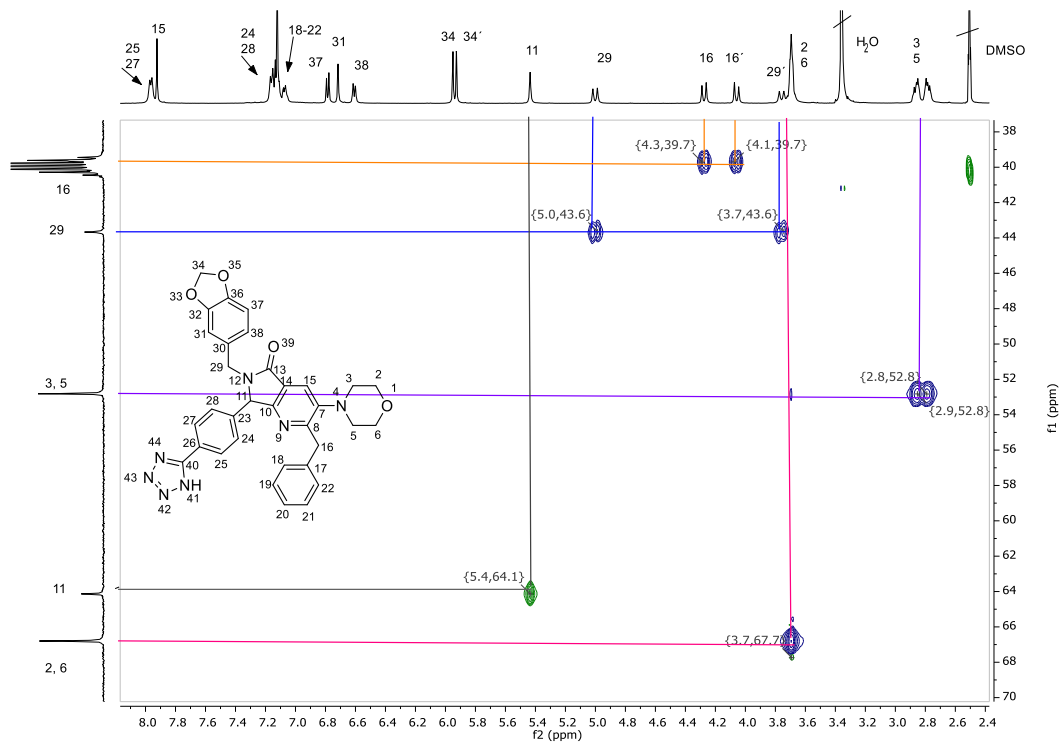

Figure S16. 2D-NMR (HSQC-part I) spectrum of the tetrazolyl-pyrrolo[3,4-*b*]pyridin-5-one **19**

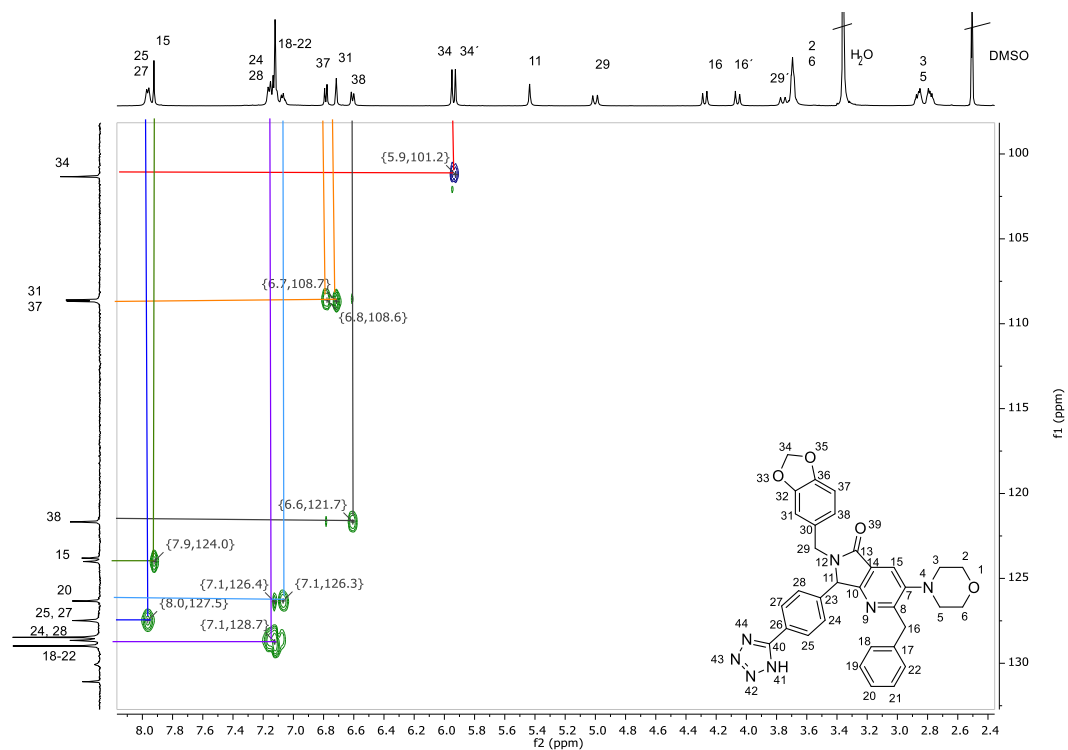

**Figure S17.** 2D-NMR (HSQC-part II) spectrum of the tetrazolyl-pyrrolo[3,4-*b*]pyridin-5-one **19**

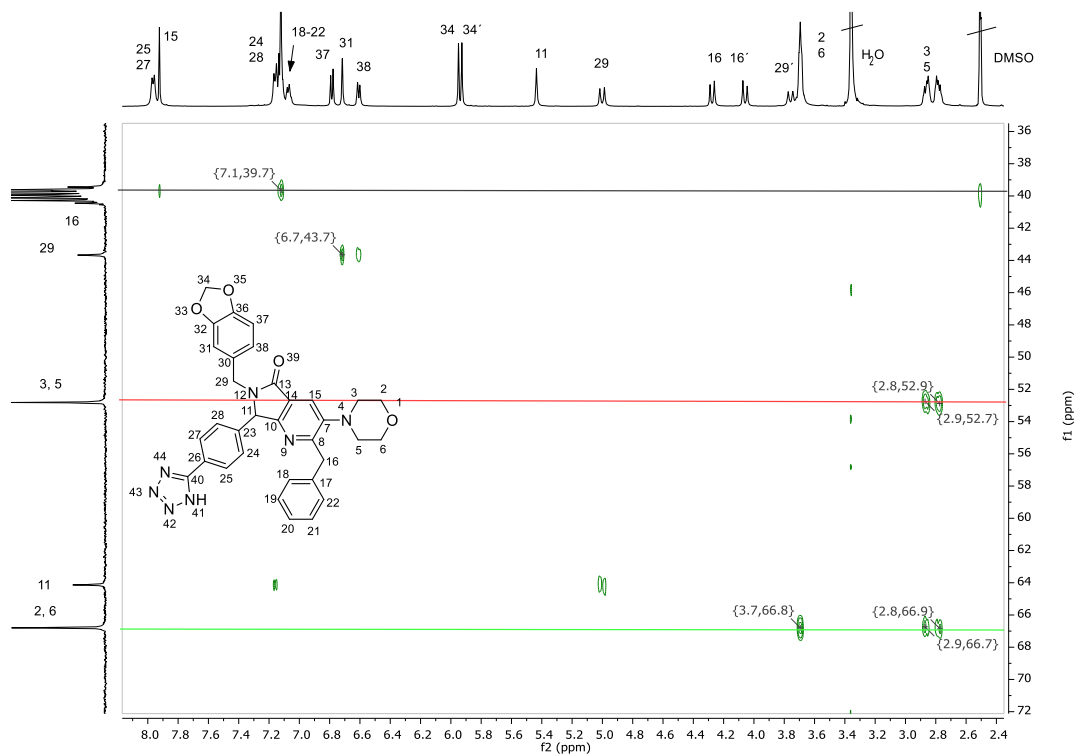

**Figure S18.** 2D-NMR (HMBC-part I) spectrum of the tetrazolyl-pyrrolo[3,4-*b*]pyridin-5-one **19**

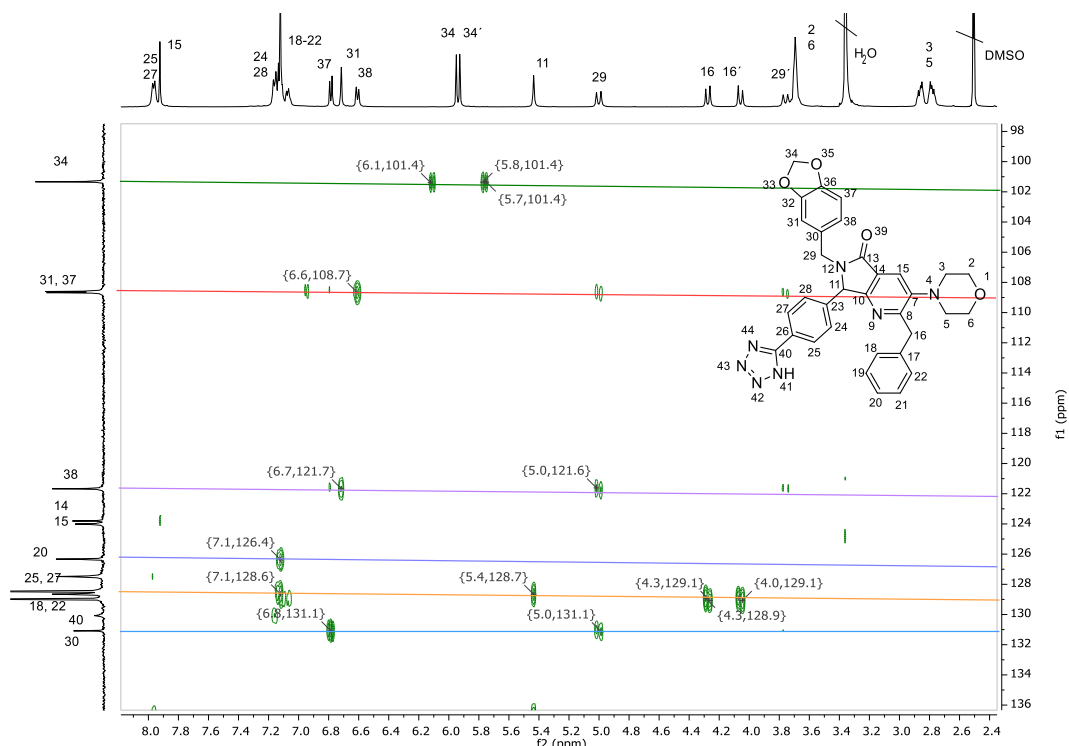

**Figure S19.** 2D-NMR (HMBC-part II) spectrum of the tetrazolyl-pyrrolo[3,4-*b*]pyridin-5-one **19**

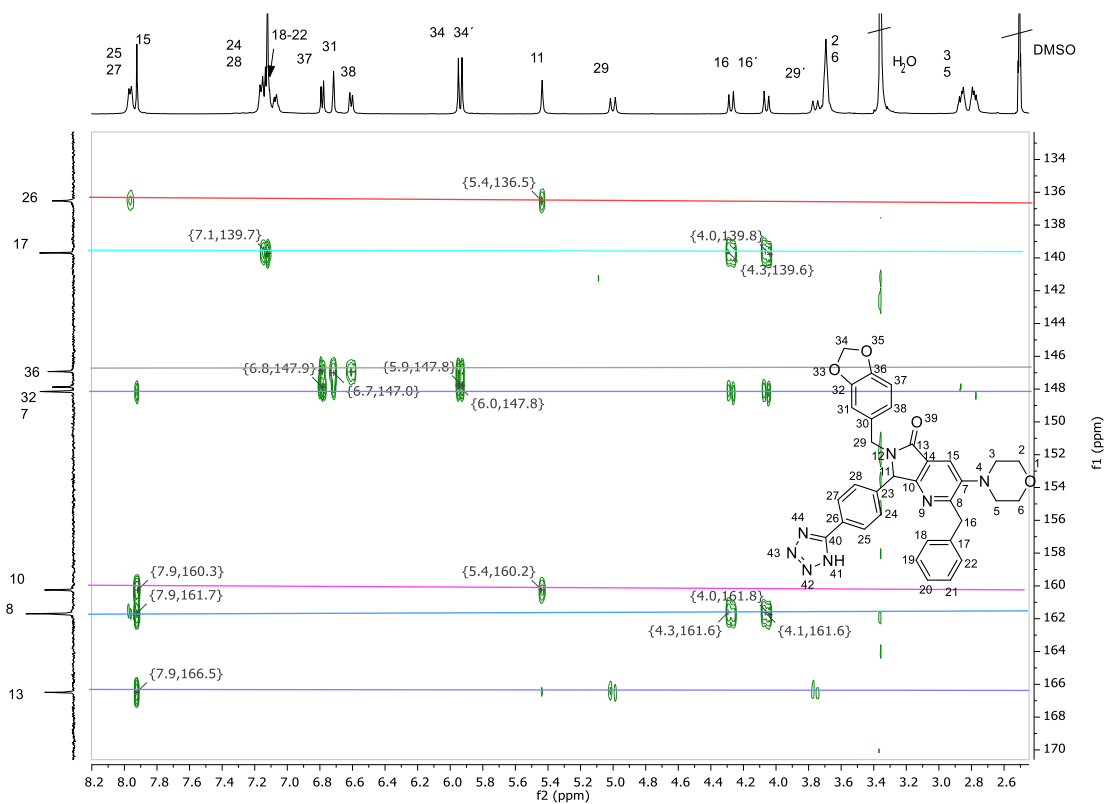

**Figure S20.** 2D-NMR (HMBC-part III) spectrum of the tetrazolyl-pyrrolo[3,4-*b*]pyridin-5-one **19**

## Mass Spectrum SmartFormula Report

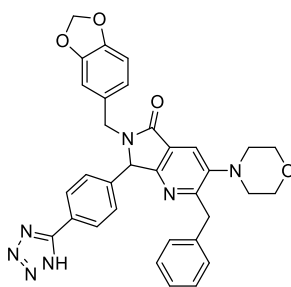

Chemical Formula: C<sub>33</sub>H<sub>29</sub>N<sub>7</sub>O<sub>4</sub>  
Exact Mass: 587.23

### Acquisition Parameter

|             |          |                      |          |                  |           |
|-------------|----------|----------------------|----------|------------------|-----------|
| Source Type | ESI      | Ion Polarity         | Positive | Set Nebulizer    | 0.3 Bar   |
| Focus       | Active   |                      |          | Set Dry Heater   | 180 °C    |
| Scan Begin  | 50 m/z   | Set Capillary        | 4500 V   | Set Dry Gas      | 4.0 l/min |
| Scan End    | 3000 m/z | Set End Plate Offset | -500 V   | Set Divert Valve | Waste     |

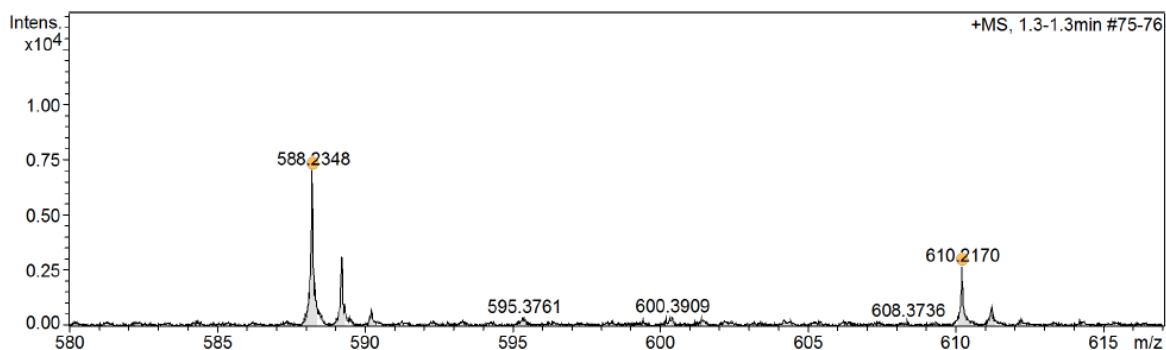

| Meas. m/z | # | Ion Formula                                                     | Sum Formula                                                   | m/z      | err [ppm] | mSigma | # Sigma |
|-----------|---|-----------------------------------------------------------------|---------------------------------------------------------------|----------|-----------|--------|---------|
| 588.2348  | 1 | C <sub>33</sub> H <sub>30</sub> N <sub>7</sub> O <sub>4</sub>   | C <sub>33</sub> H <sub>29</sub> N <sub>7</sub> O <sub>4</sub> | 588.2354 | -1.0      | 31.8   | 3       |
| 610.2170  | 1 | C <sub>33</sub> H <sub>29</sub> N <sub>7</sub> NaO <sub>4</sub> |                                                               | 610.2173 | -0.5      | 36.0   | 7       |

Figure S21. HRMS (ESI+-TOF) spectrum of the tetrazolyl-pyrrolo[3,4-*b*]pyridin-5-one **19**

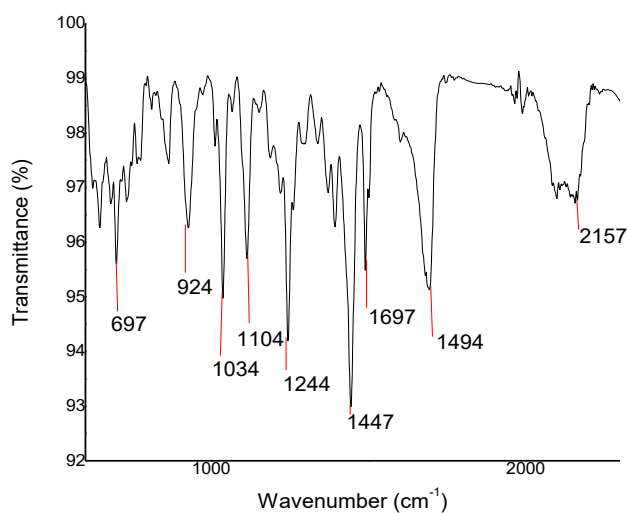

Figure S22. FT-IR (ATR) spectrum of the tetrazolyl-pyrrolo[3,4-*b*]pyridin-5-one **19**



**Table S5.** Synthesis of the 2,4-diamino-1,3,5-triazine-pyrrolo[3,4-*b*]pyridin-5-one **21** via a [4+2] cycloaddition.

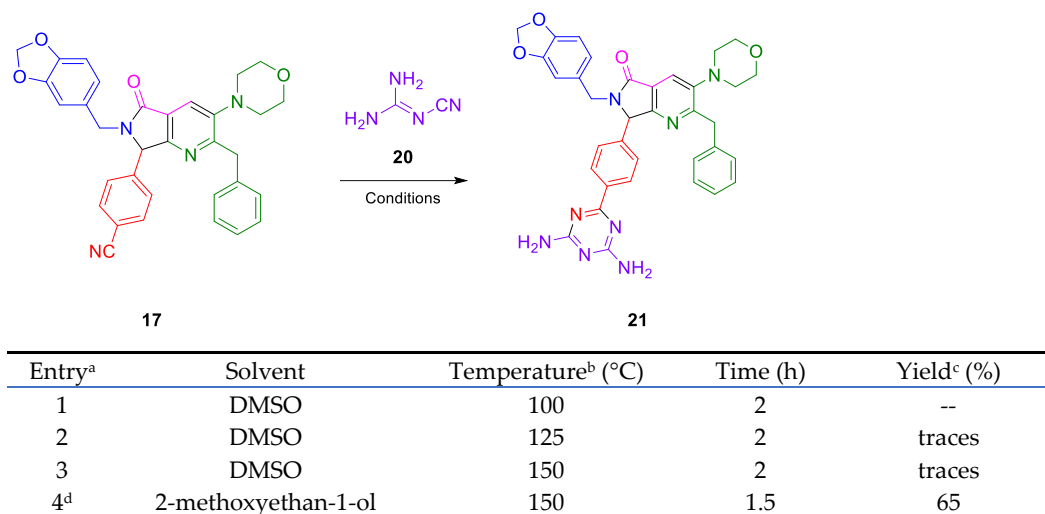

<sup>a</sup> KOH (8% mol) was the catalyst, and concentration in all inputs was [1.5 M]. <sup>b</sup> MW were the heating source.

<sup>c</sup> Calculated after purification by precipitation–filtration. <sup>d</sup> Optimal reaction conditions.

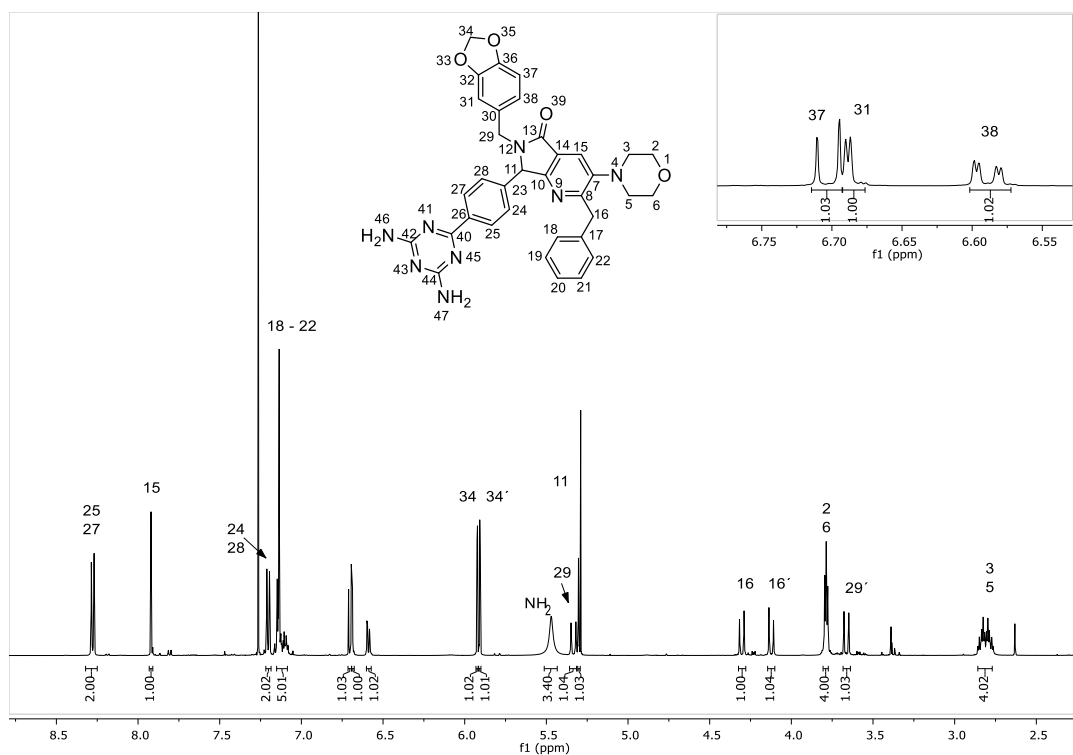

**Figure S23.**  $^1\text{H}$ -NMR (500 MHz,  $\text{CDCl}_3$ ) spectrum of the triazine-pyrrolo[3,4-*b*]pyridin-5-one **21**

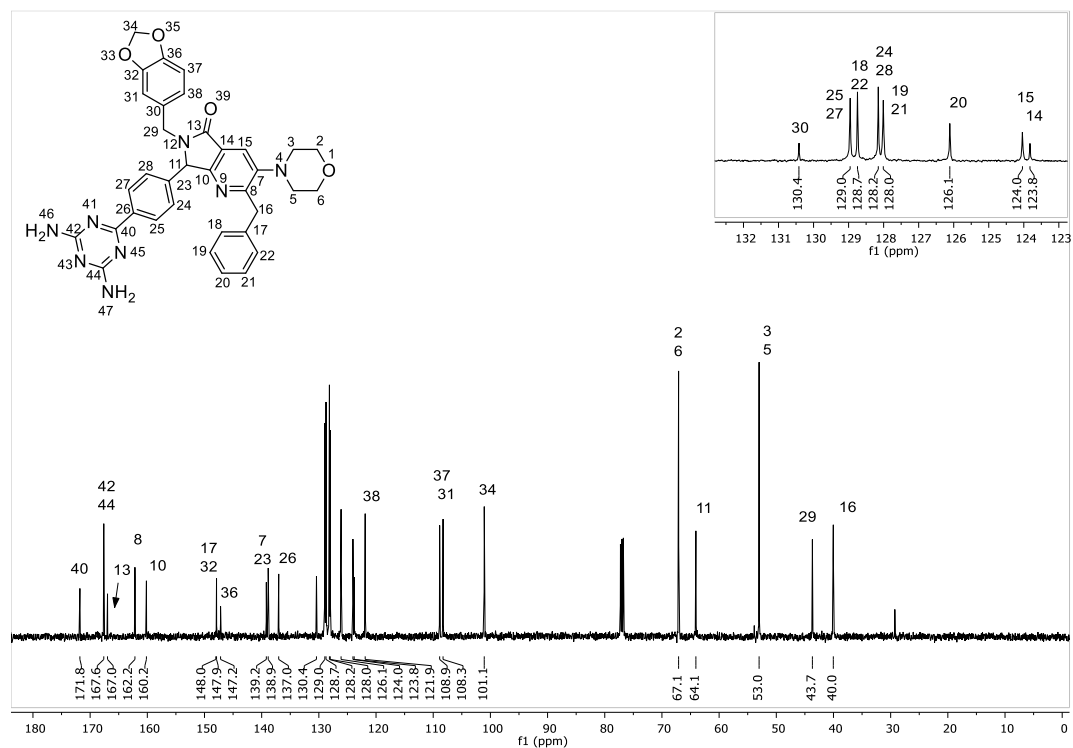

**Figure S24.**  $^{13}\text{C}$ -NMR (125 MHz,  $\text{CDCl}_3$ ) spectrum of the triazine-pyrrolo[3,4-*b*]pyridin-5-one **21**

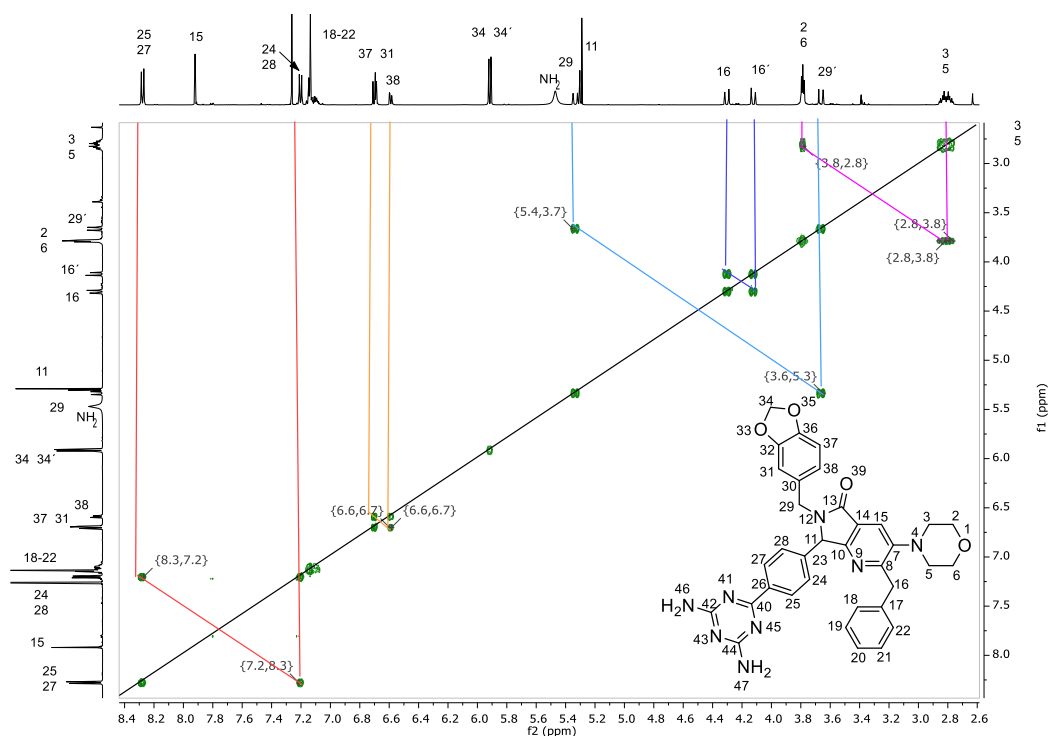

Figure S25. 2D-NMR (COSY) spectrum of the triazine-pyrrolo[3,4-*b*]pyridin-5-one **21**

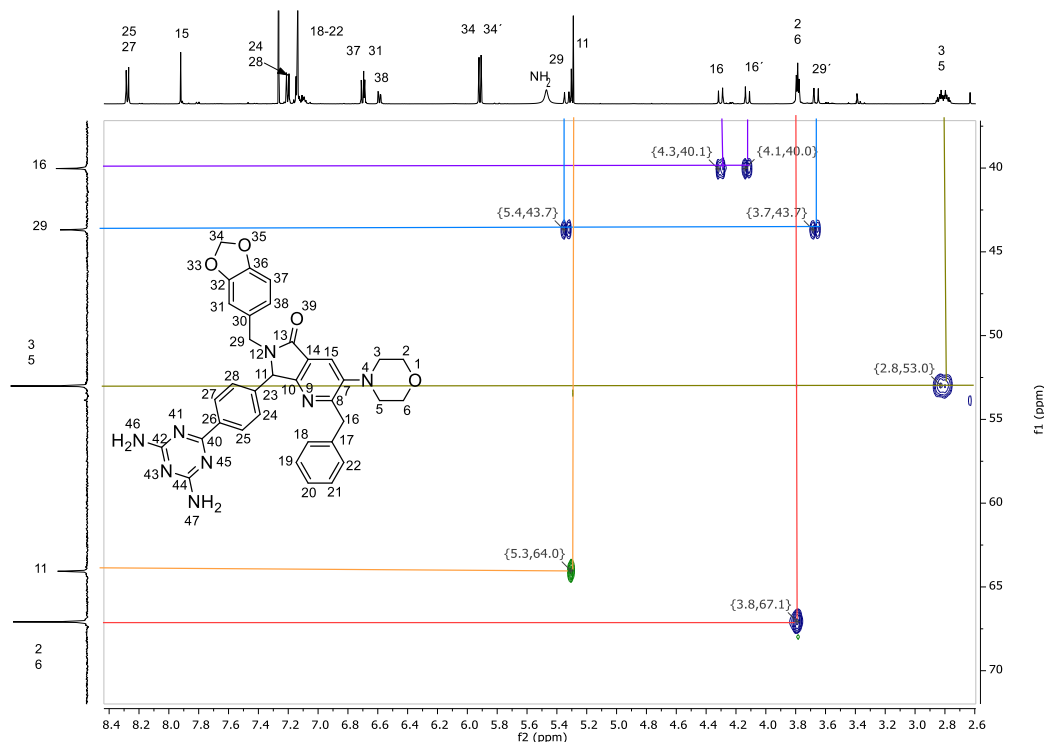

Figure S26. 2D-NMR (HSQC-part I) spectrum of the triazine-pyrrolo[3,4-*b*]pyridin-5-one **21**

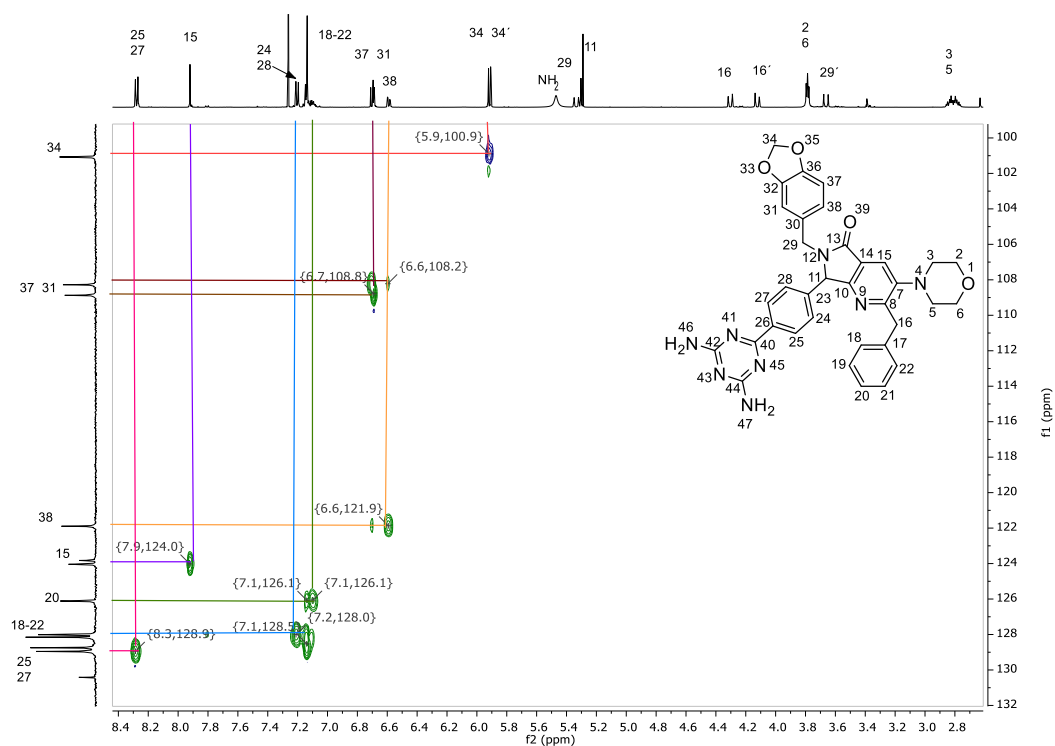

**Figure S27.** 2D-NMR (HSQC-part II) spectrum of the triazine-pyrrolo[3,4-*b*]pyridin-5-one **21**

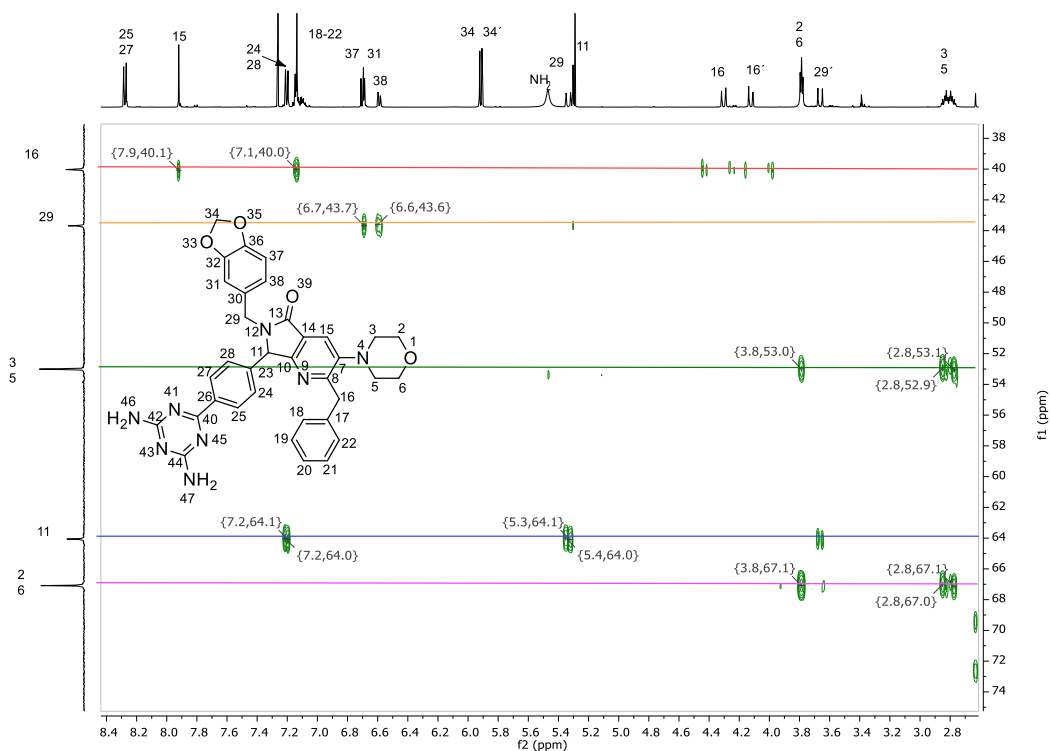

**Figure S28.** 2D-NMR (HMBC-part I) spectrum of the triazine-pyrrolo[3,4-*b*]pyridin-5-one **21**

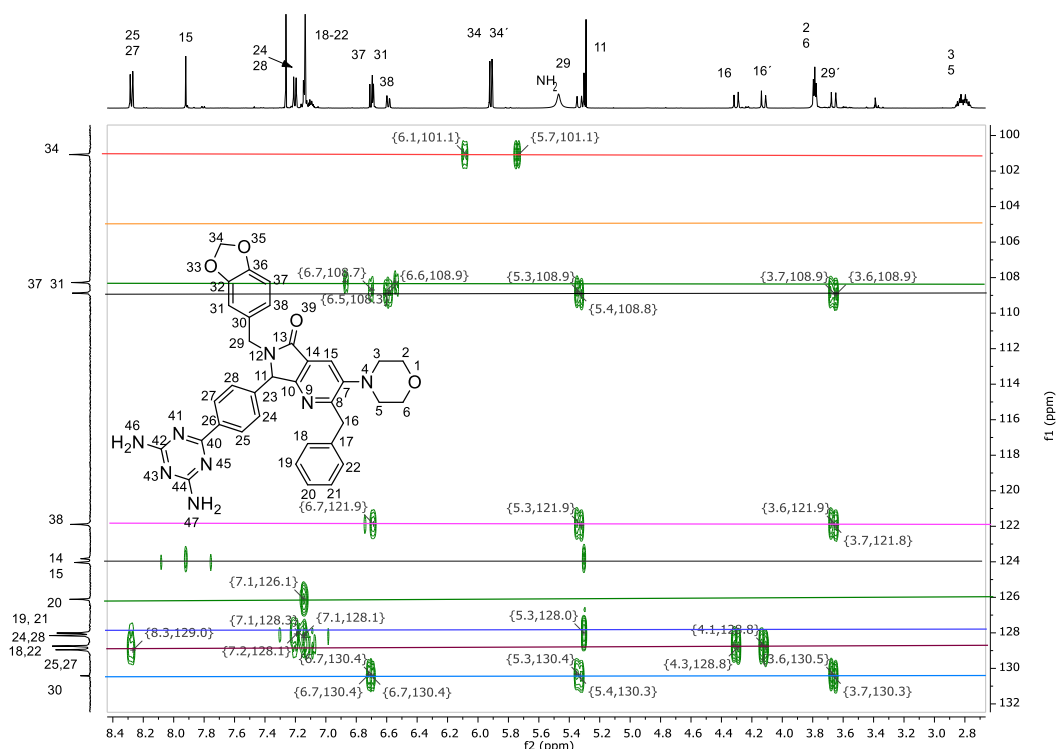

Figure S29. 2D-NMR (HMBC-part II) spectrum of the triazine-pyrrolo[3,4-*b*]pyridin-5-one **21**

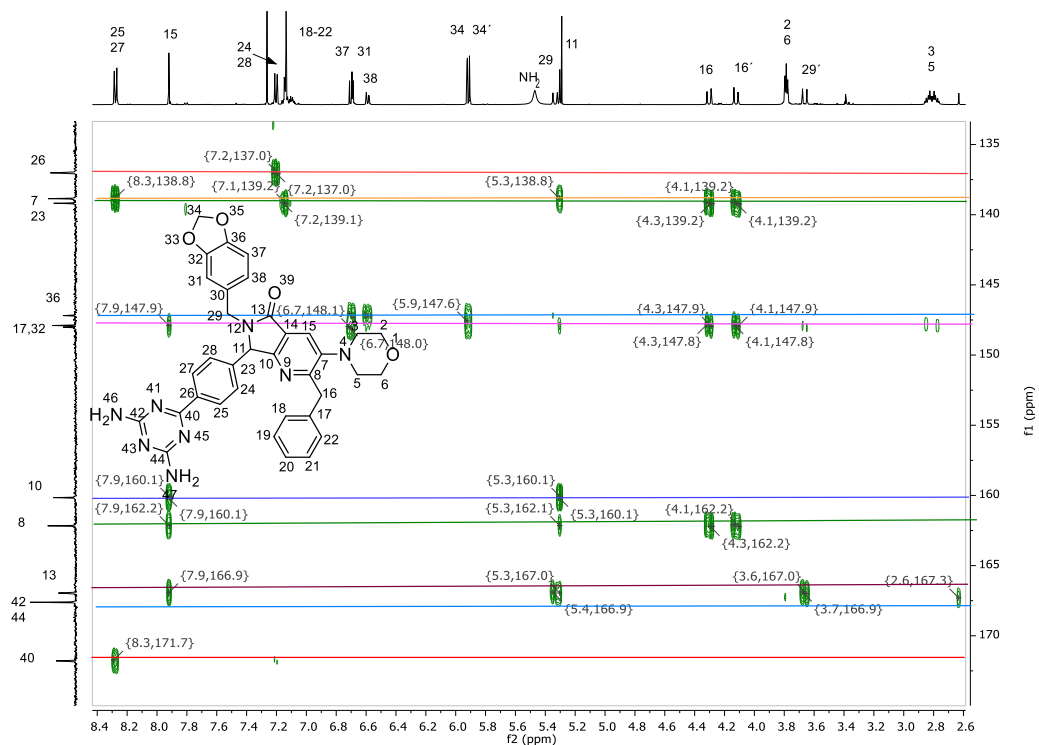

Figure S30. 2D-NMR (HMBC-part III) spectrum of the triazine-pyrrolo[3,4-*b*]pyridin-5-one **21**

## Mass Spectrum SmartFormula Report

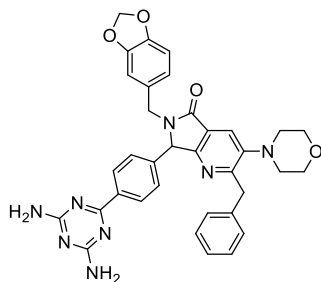

Chemical Formula: C<sub>35</sub>H<sub>32</sub>N<sub>8</sub>O<sub>4</sub>  
Exact Mass: 628.25

### Acquisition Parameter

|             |          |                      |          |                  |           |
|-------------|----------|----------------------|----------|------------------|-----------|
| Source Type | ESI      | Ion Polarity         | Positive | Set Nebulizer    | 0.3 Bar   |
| Focus       | Active   |                      |          | Set Dry Heater   | 180 °C    |
| Scan Begin  | 50 m/z   | Set Capillary        | 4500 V   | Set Dry Gas      | 4.0 l/min |
| Scan End    | 3000 m/z | Set End Plate Offset | -500 V   | Set Divert Valve | Waste     |

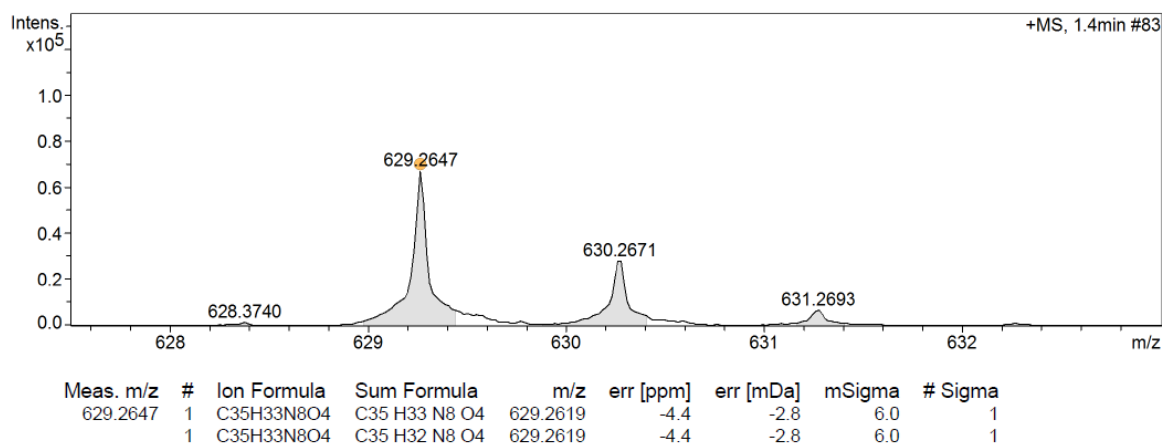

Figure S31. HRMS (ESI<sup>+</sup>-TOF) spectrum of the triazine-pyrrolo[3,4-*b*]pyridin-5-one 21

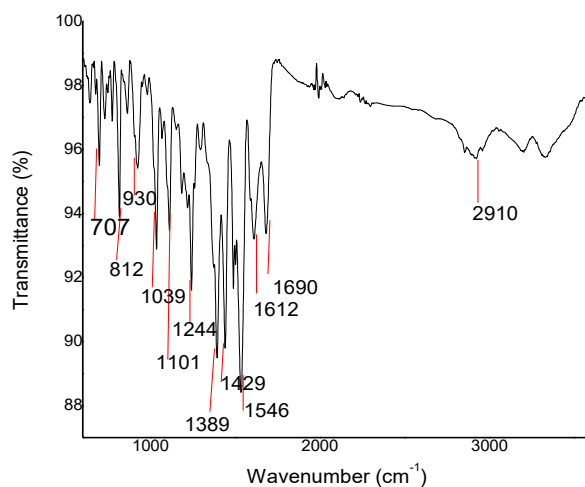

Figure S32. FT-IR (ATR) spectrum of the triazine-pyrrolo[3,4-*b*]pyridin-5-one 21
